# Supplementary material
Source: PubMed Central journal article supplement (PMC5400722)

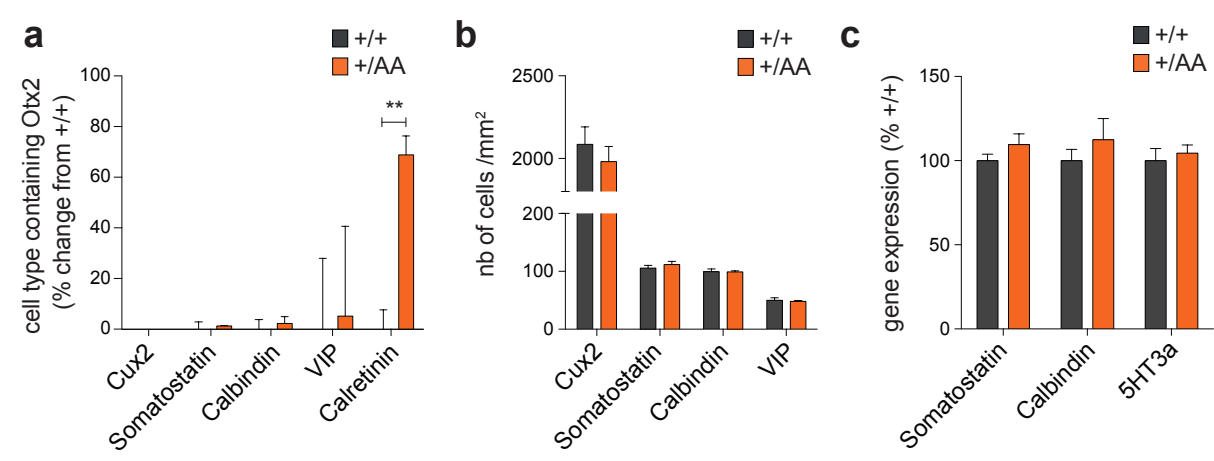

SUPPL 2

Supplement: NIHMS838631-supplement-2.pdf [file NIHMS838631-supplement-2.pdf]

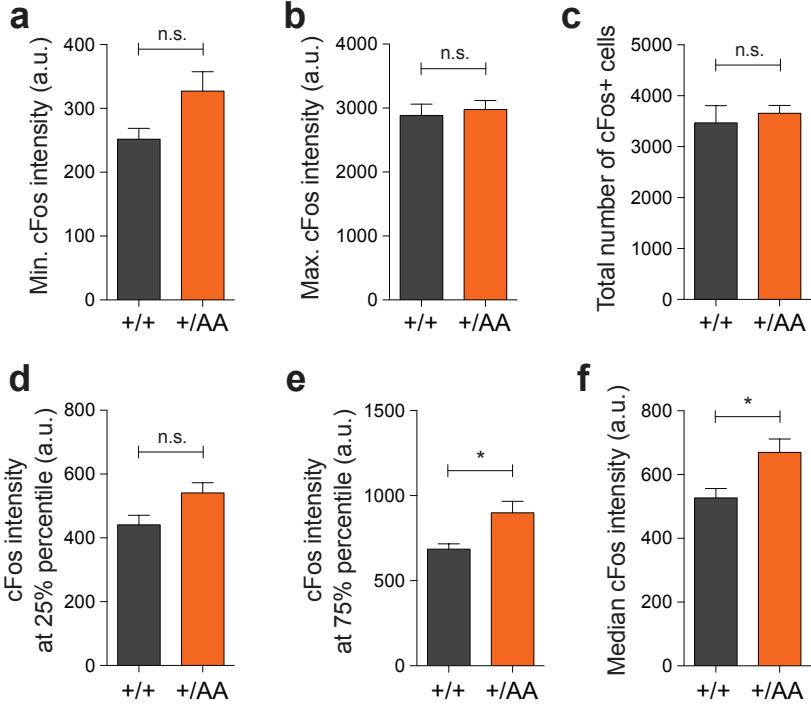

SUPPL 4

Supplement: NIHMS838631-supplement-4.pdf [file NIHMS838631-supplement-4.pdf]

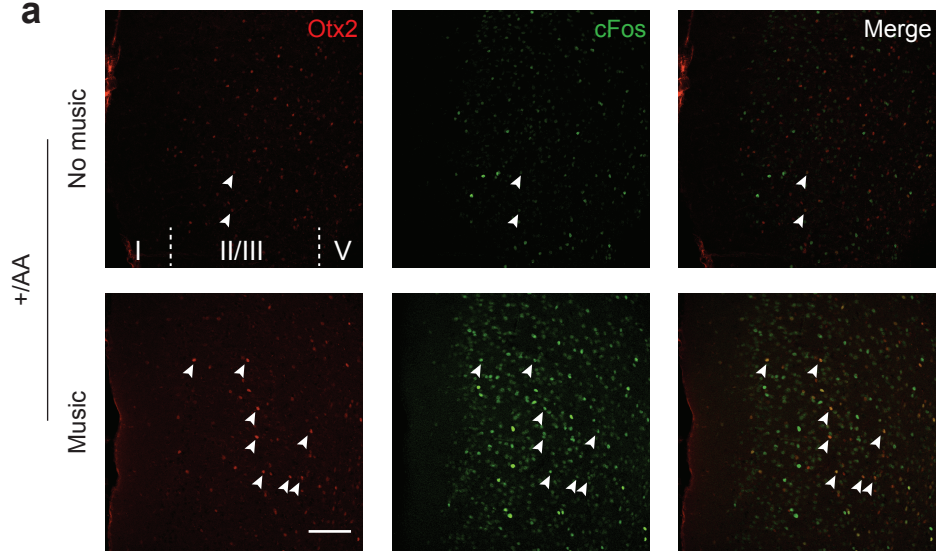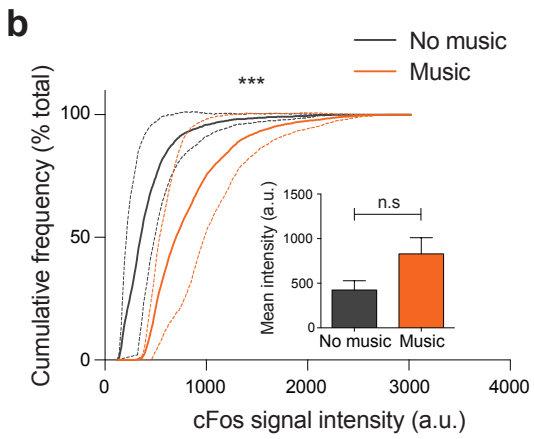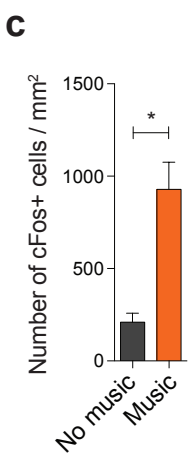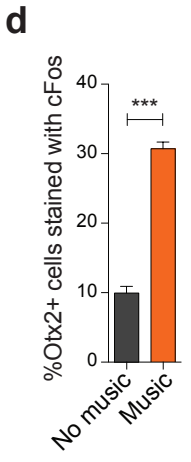

SUPPL 5

Supplement: NIHMS838631-supplement-5.pdf [file NIHMS838631-supplement-5.pdf]
